# Supplementary material for: HPV16 variants distribution in invasive cancers of the cervix, vulva, vagina, penis, and anus
Source: PubMed Central journal article supplement (PMC5083745; doi:10.1002/cam4.870), 2016-09-21
Supplement: CAM4-5-2909-s001.pdf [file CAM4-5-2909-s001.pdf]

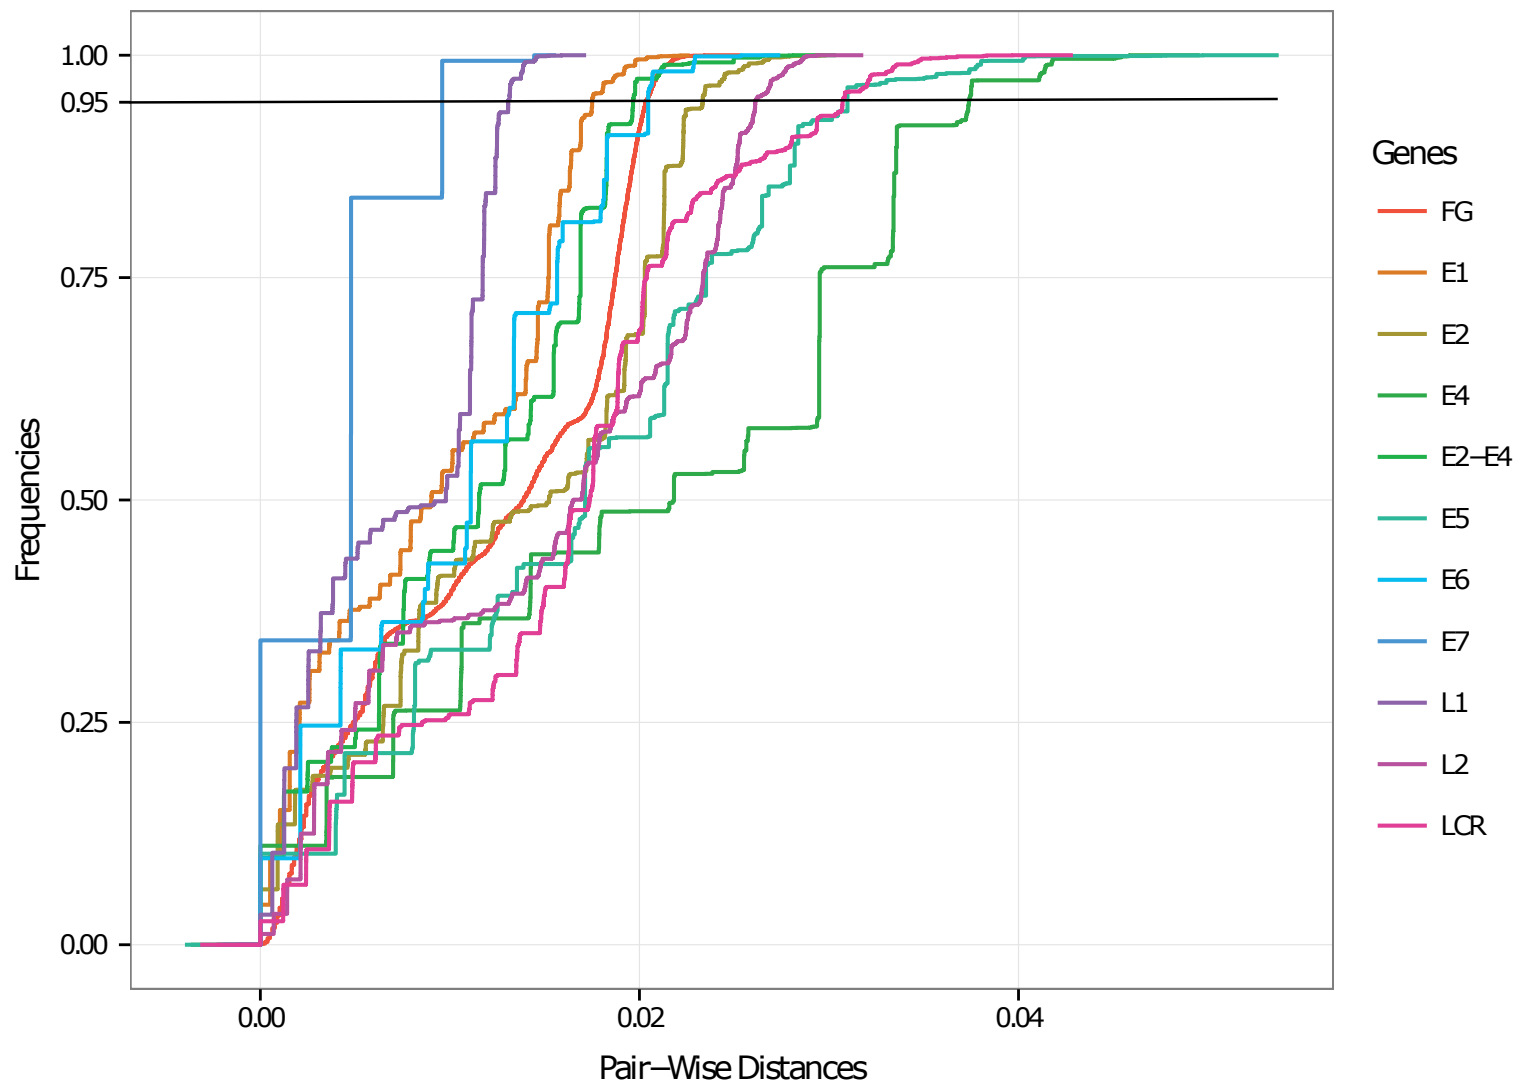

**Figure S1: Cumulative pair-wise distance frequencies for HPV16 genes and control region:** Pair-wise distances (substitutions per site) are calculated for the full-genome, LCR and all ORFs of reference sequences. Horizontal plain grey line represent the pair-wise distance 95th percentile. E2-E4 (E2 minus E4) stands for the E2 gene non-overlapping with the E4 gene.
