# Supplementary material for: HPV16 variants distribution in invasive cancers of the cervix, vulva, vagina, penis, and anus
Source: PubMed Central journal article supplement (PMC5083745; doi:10.1002/cam4.870), 2016-09-21
Supplement: CAM4-5-2909-s003.pdf [file CAM4-5-2909-s003.pdf]

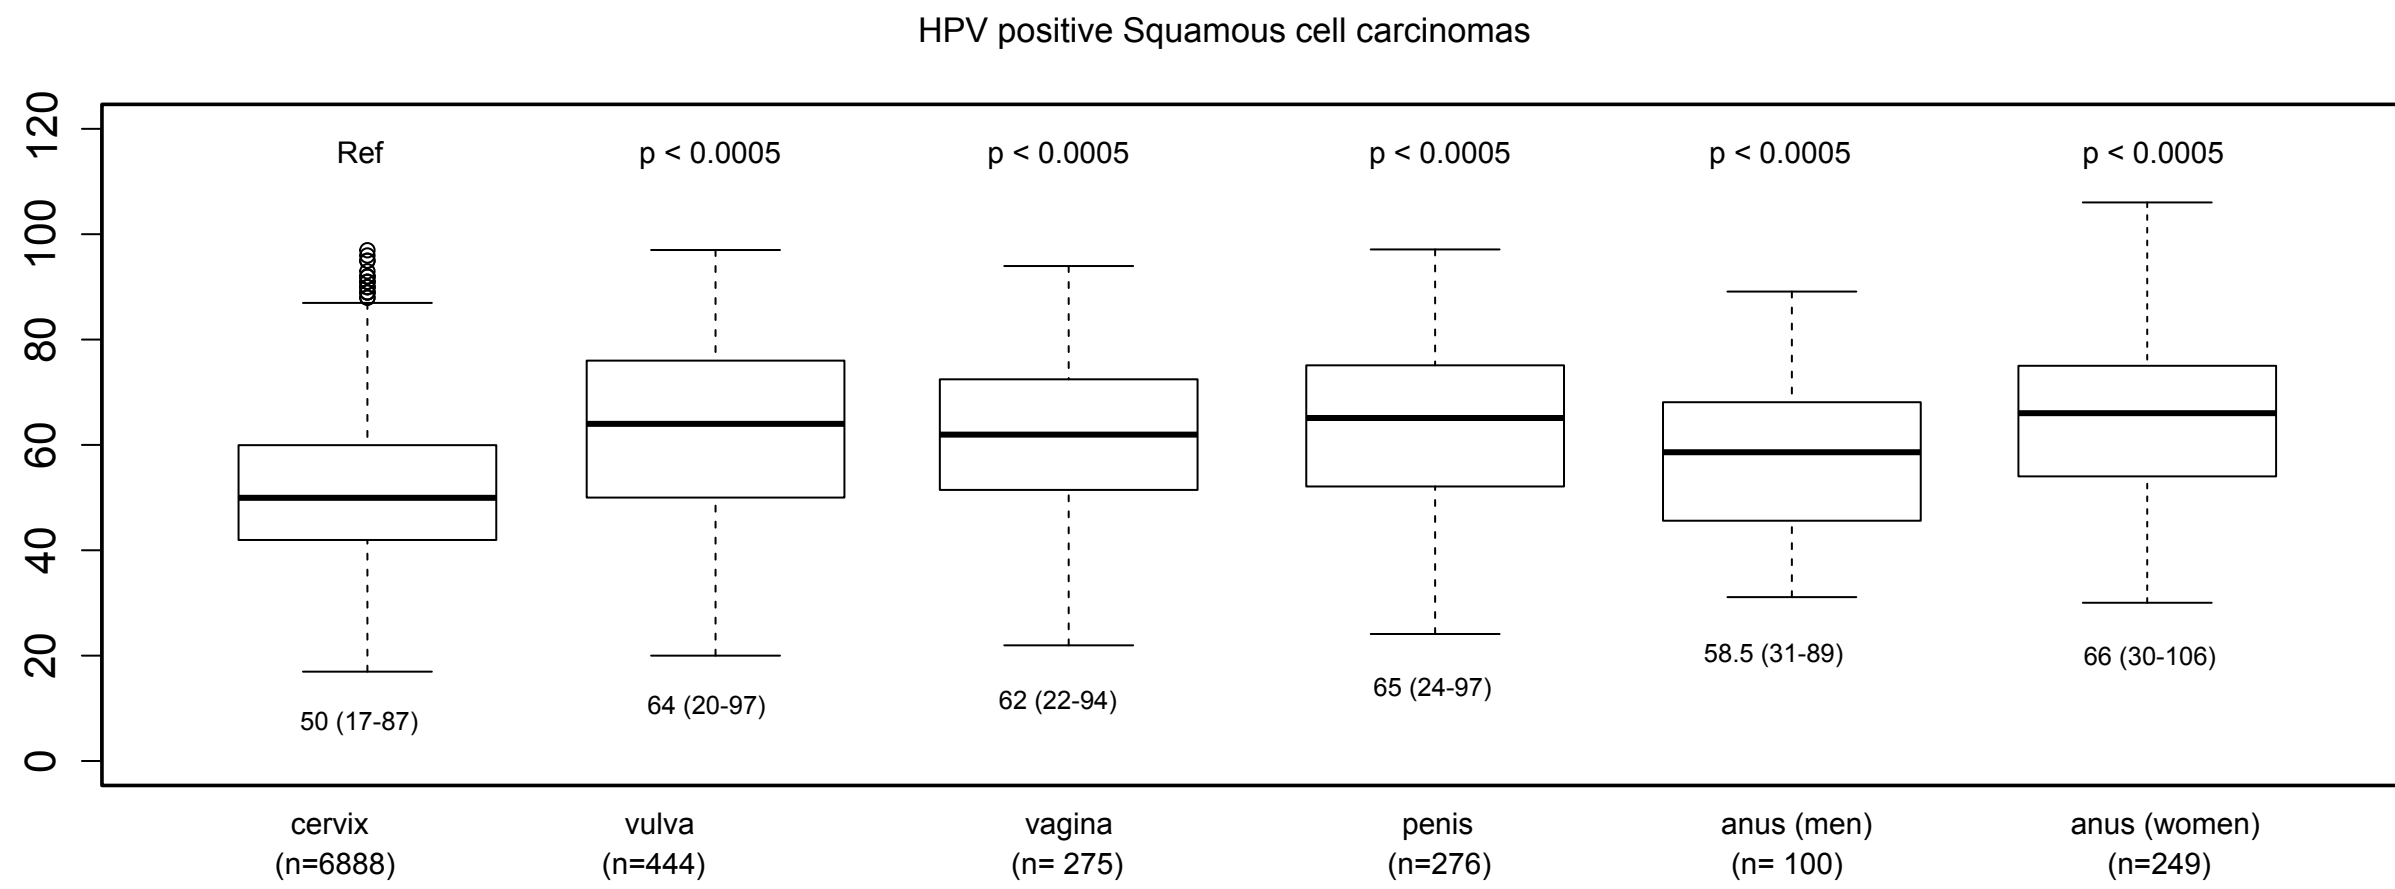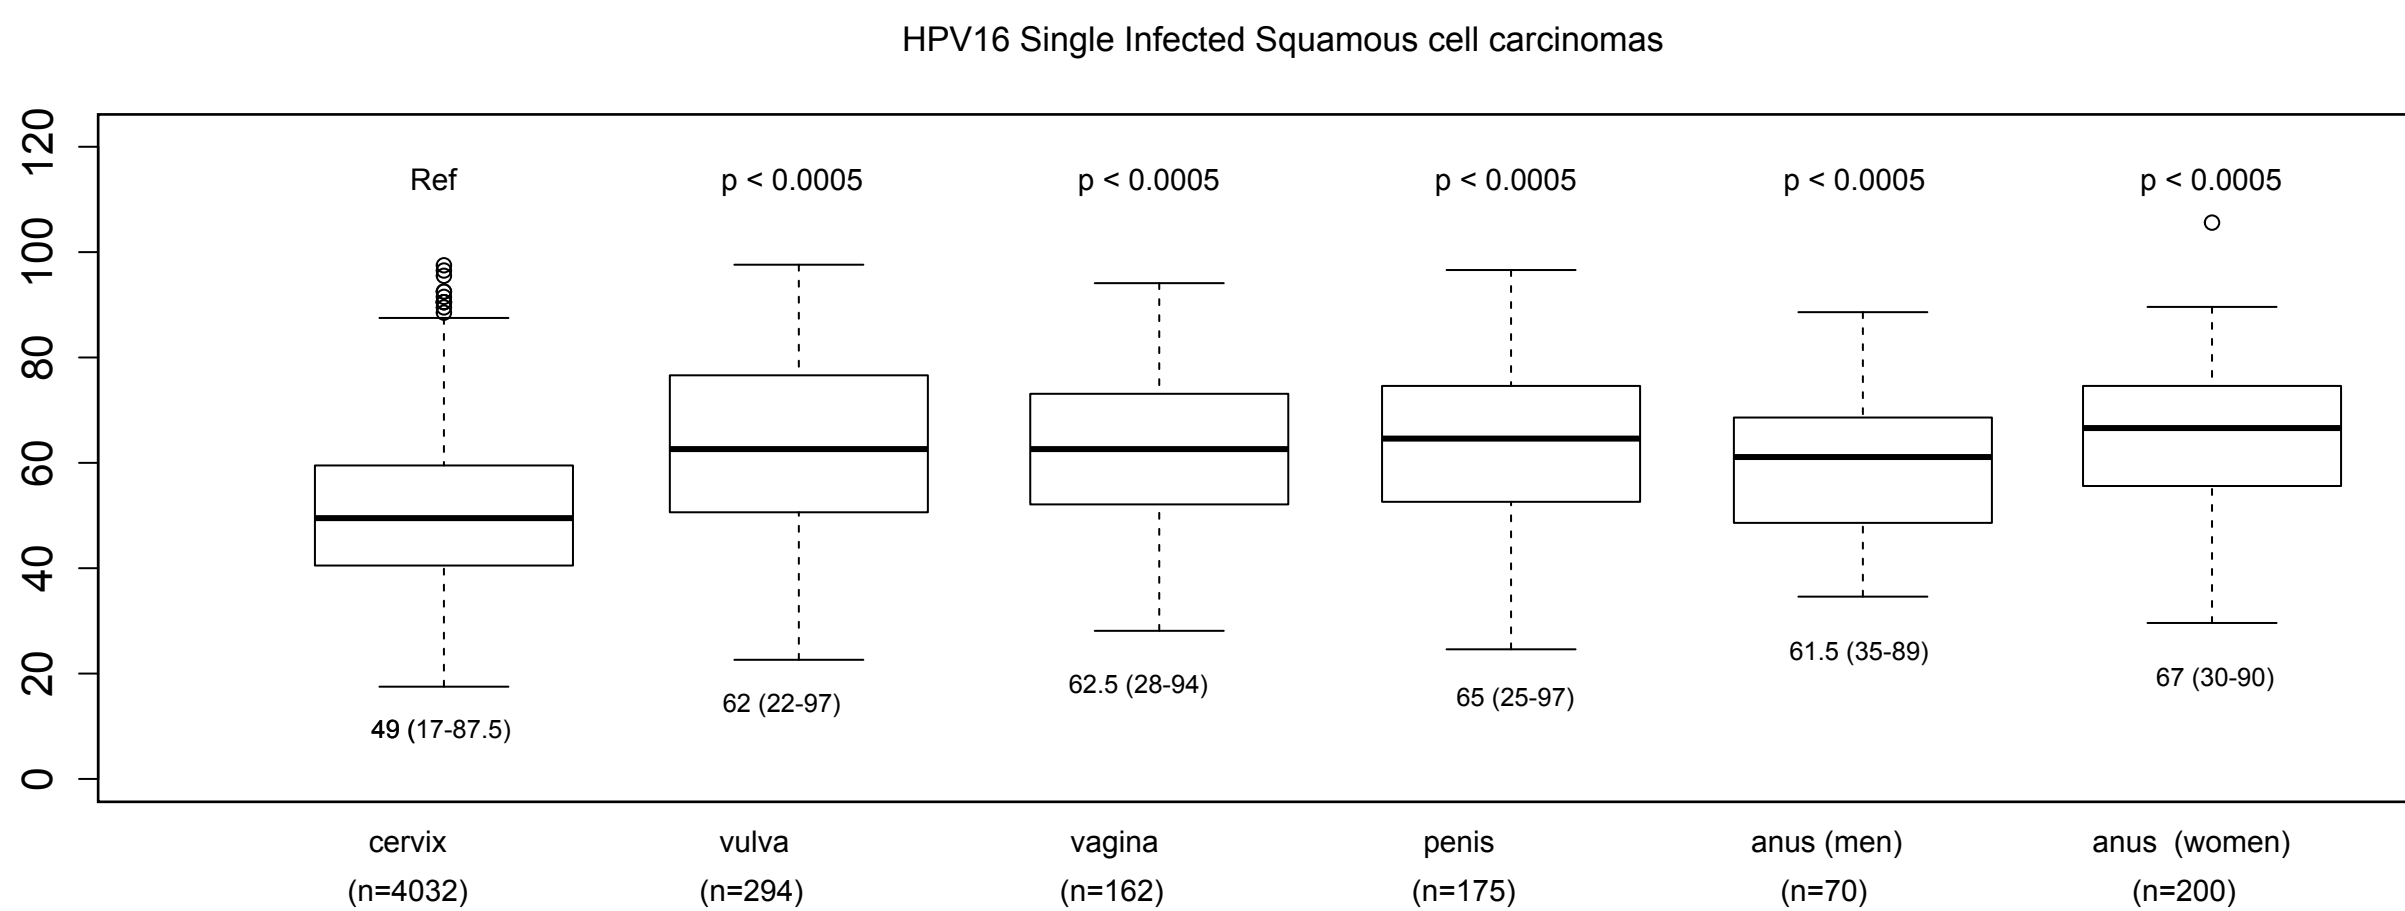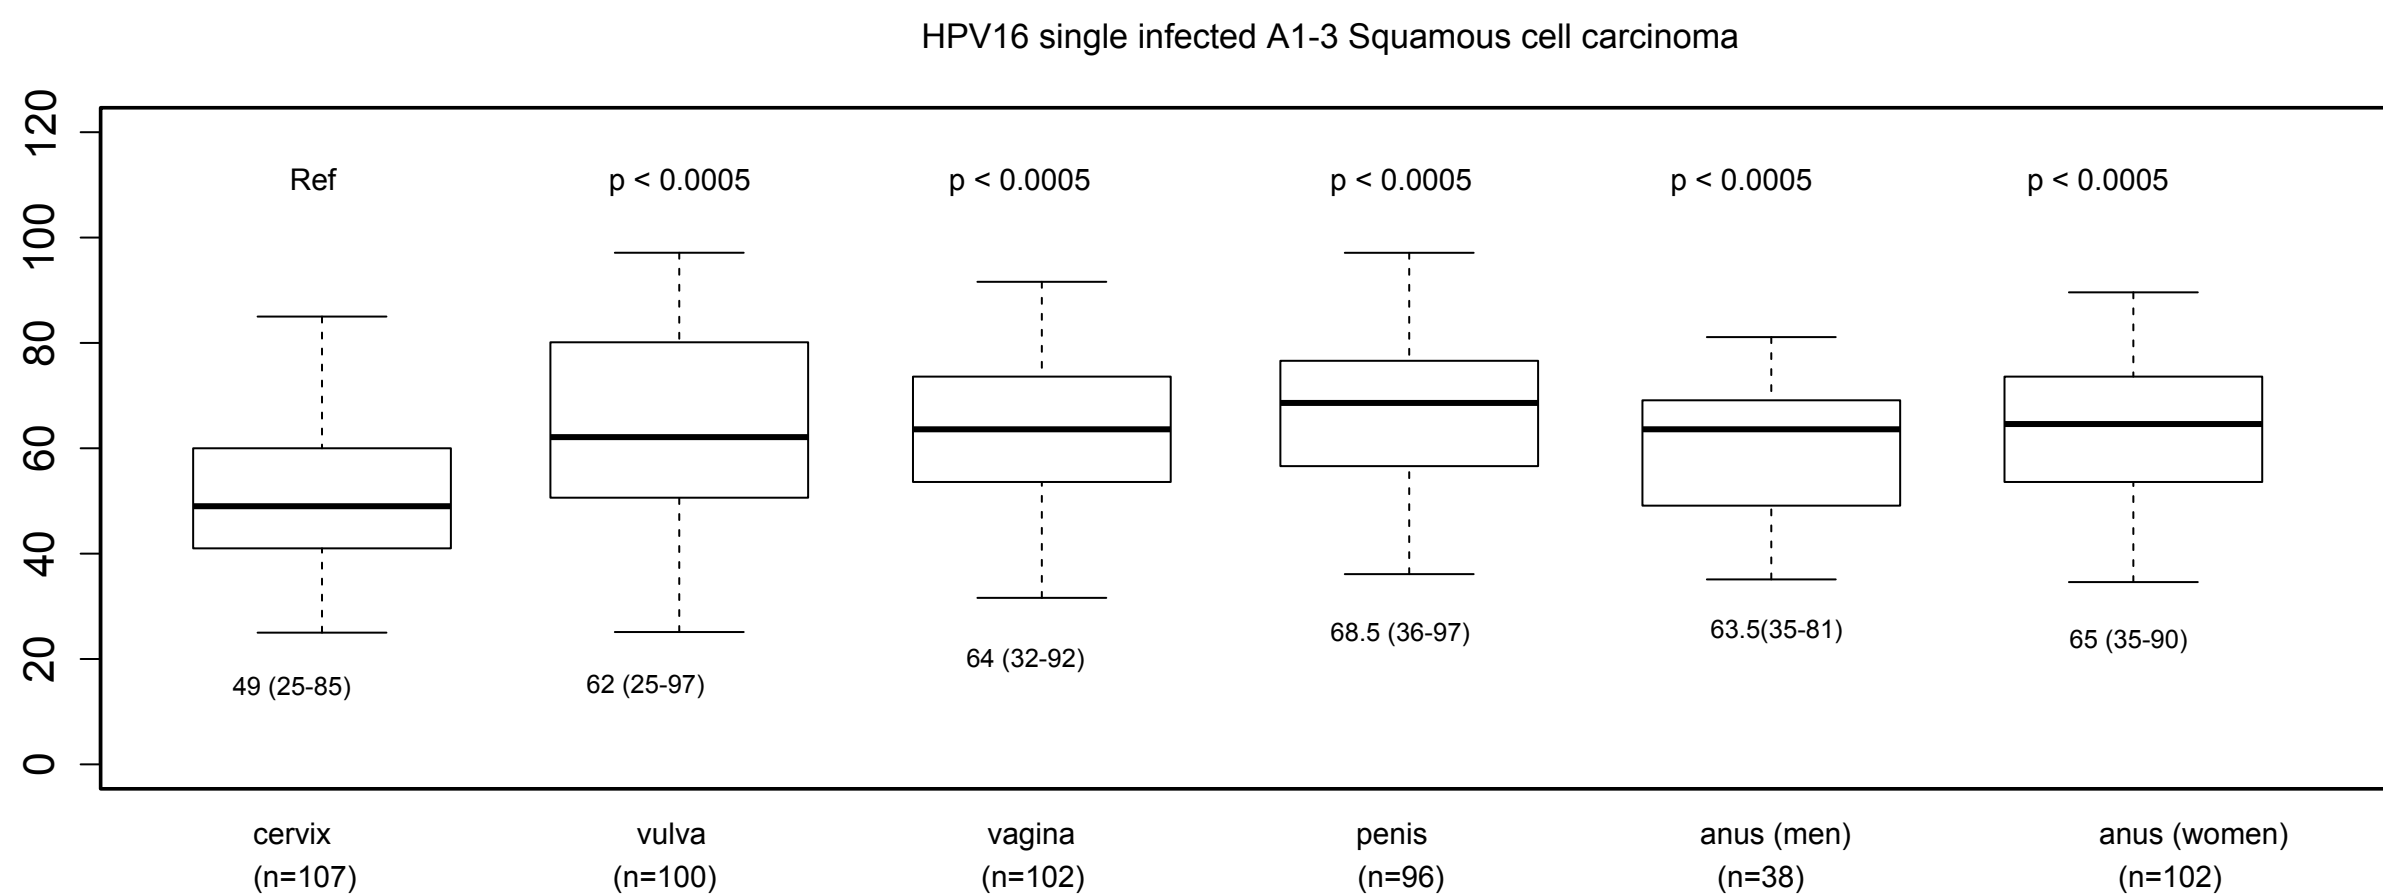

**Figure S3: Age at tumour diagnosis for HPV positive, HPV16 single infected and HPV16 A1-3 invasive squamous cell carcinomas stratified by anatomical location:** Boxplots represent the median, the 25% and 75% quantiles. Median and range (1.5 x Inter-quantile) are represented in brackets below the boxplots. Number of samples are represented in brackets below the anatomical location. HPV16 positive samples include all the types detectable through SPF10-LIPA25 protocol (version 1; Laboratory Biomedical Products, Rijswijk, Netherlands)
